# Supplementary material for: Cationic coordination polymers with thirteen-fold interpenetrating dia networks: selective coloration and ion-controlled photochromism
Source: Royal Society of Chemistry journal article supplement (doi:10.1039/d1cc05255a), 2021-01-01
Supplement: d1cc05255a1.pdf [file d1cc05255a1.pdf]

## Supporting Information

### **Cationic coordination polymer with thirteen-fold interpenetrating dia network: selective coloration and ion-controlled photochromism**

Xin Li<sup>a</sup>, Yanger Li<sup>a</sup>, Xiaoman Yang<sup>a</sup>, Chaoyue Yan<sup>a</sup>, Kai Zhang<sup>a</sup>, Xiaoxiao Liang<sup>a</sup>, Jinli Zhang<sup>a</sup>,

Yanli Gai<sup>\*,a</sup> and Kecai Xiong<sup>\*,a,b</sup>

<sup>a</sup>School of Chemistry and Materials Science, Jiangsu Normal University, Xuzhou, Jiangsu, 221116, P.  
R. China

<sup>b</sup>State Key Lab of Structure Chemistry, Fujian Institute of Research on the Structure of Matter, Chinese  
Academy of Sciences, Fuzhou, Fujian, 350002, P. R. China

\*Corresponding authors:

E-mail: [kcxiong@jsnu.edu.cn](mailto:kcxiong@jsnu.edu.cn);

[ylgai@jsnu.edu.cn](mailto:ylgai@jsnu.edu.cn).

## 1 EXPERIMENTAL SECTION

2 **Materials and Measurements.** 1,1'-bis(4-carboxyphenyl)-(4,4'-bipyridinium) dichloride was  
3 prepared according to the literatures,<sup>S1</sup> while other chemicals with reagent-grade quality were obtained  
4 from commercial sources and used without further purification. The infrared spectra were recorded on a  
5 Thermo Scientific Nicolet iS10 FT-IR spectrometer as KBr pellets in the range of 400-4000 cm<sup>-1</sup>. The  
6 solid UV-vis spectra were confirmed on a Perkin-Elmer Lambda 900 spectrometer. The powder X-ray  
7 diffraction (PXRD) patterns were collected on a Bruker D8 Advance powder diffractometer with Cu  
8 K $\alpha$  radiation ( $\lambda = 1.5406 \text{ \AA}$ ) at a scanning rate of 2 $^\circ$ ·min<sup>-1</sup> for 2 $\theta$  ranging from 3 $^\circ$  to 50 $^\circ$ .  
9 Thermogravimetric analysis was carried out in the temperature range of 30-800  $^\circ$ C on a TA Q50  
10 apparatus. Scanning electron microscopy (SEM) images were performed on a Hitachi SU8010  
11 instrument equipped with an energy-dispersive spectroscopy (EDS) detector. EPR experiments were  
12 recorded on a Bruker E-500 spectrometer working at X band (9.8 GHz). Raman spectra were carried  
13 out on a B&W TEK BWS415-785S spectrometer, which was equipped with 100% laser power  
14 irradiation in order to minimize the fluorescence interference. Laser: 785 nm, laser intensity: 10 mW.  
15 Cyclic voltammetry (CV) was carried out on a CHI760E workstation (Shanghai CH Instrument Company,  
16 China) with a three-electrode system, where the counter, reference and working electrodes are a platinum  
17 wire, an Ag/AgCl electrode and a modified glassy carbon electrode (GCE), respectively. For preparation of  
18 the modified GCE, a bare GCE ( $\Phi = 3\text{mm}$ ) was polished with slurry alumina, sonicated and washed  
19 thoroughly with ethanol and deionized water. 1 mg samples of **Cd-CCP** or **Cd-CCP-X** ( $X = \text{F}^-$ ,  $\text{Cl}^-$ ,  $\text{Br}^-$   
20 and  $\text{I}^-$ ) were dispersed in the mixture of 0.1mL deionized water and 10  $\mu\text{L}$  Nafion (5%) by sonication to  
21 form a suspension. Then 2.5  $\mu\text{L}$  suspension was drop-coated onto the modified GCE, and the electrode was  
22 dried in air.

23 **Synthesis of Cd-CCP.** H<sub>2</sub>bcbpCl<sub>2</sub> (19 mg, 0.04 mmol) and cadmium iodide (37 mg, 0.1 mmol) were  
24 added to a mixed solution of deionized water and acetonitrile (3/3 mL). The resulting solution was  
25 placed in a 23mL Teflon-lined stainless-steel autoclave and heated in an oven at 140  $^\circ$ C for five days.  
26 After cooling to room temperature, red block crystals (15 mg) were obtained in 24% yield based on

1 H<sub>2</sub>bcbpCl<sub>2</sub>. FT-IR (KBr disk,  $\nu$  cm<sup>-1</sup>): 3116 (w), 3051 (w), 1633 (s), 1611 (s), 1574 (m), 1535 (m),  
2 1486 (w), 1435 (m), 1389 (s), 1300 (w), 1248 (w), 1221 (w), 1039 (w), 1020 (w), 1006 (w), 852 (m),  
3 830 (m), 784 (s), 755 (w), 700 (w), 666 (w), 577 (w), 471 (w).

4 **X-ray Data Collection and Structure Determination.** Data collection for **Cd-CCP** was performed  
5 on a Bruker APEXII diffractometer equipped with graphite monochromated Mo-K $\alpha$  radiation ( $\lambda =$   
6 0.71073 Å) by using the  $\omega$ -scan mode at 293(2) K. The structure was solved by direct methods, the  
7 metal atoms were located from the E-maps, and other non-hydrogen atoms were derived from the  
8 successive difference Fourier peaks. The structure was refined on  $F^2$  by full-matrix least-squares using  
9 the *SHELXTL*-2014 program package.<sup>S2</sup> All non-hydrogen atoms were refined anisotropically.  
10 Hydrogen atoms of the organic ligands were generated theoretically onto the specific atoms and refined  
11 with fixed thermal factors. Details of the structure solution and final refinement for **Cd-CCP** are given  
12 in Table S1. CCDC-2040463 contains the supplementary crystallographic data.

1 **Table S1.** Crystal Data and Data Collection and Refinement Parameters for **Cd-CCP**.

| Compound                     | <b>Cd-CCP</b>                  |
|------------------------------|--------------------------------|
| formula                      | $C_{48}H_{38}N_4O_{11}I_4Cd_2$ |
| formula weight               | 1579.22                        |
| temperature (K)              | 293 (2)                        |
| wavelength (Å)               | 0.71073                        |
| crystal system               | monoclinic                     |
| space group                  | $P2_1/c$                       |
| $a$ (Å)                      | 10.9067(3)                     |
| $b$ (Å)                      | 33.3651(10)                    |
| $c$ (Å)                      | 14.2180(5)                     |
| $\alpha$ (°)                 | 90                             |
| $\beta$ (°)                  | 96.6610(10)                    |
| $\gamma$ (°)                 | 90                             |
| volume (Å <sup>3</sup> )     | 5139.0(3)                      |
| $Z$                          | 4                              |
| $D_c$ (Mg/m <sup>3</sup> )   | 2.041                          |
| $\mu$ (mm <sup>-1</sup> )    | 3.292                          |
| data collected               | 79202                          |
| unique data ( $R_{int}$ )    | 10508                          |
| parameters                   | 626                            |
| GOF on $F^2$                 | 1.059                          |
| $R_1^a$ [ $I > 2\sigma(I)$ ] | 0.0742                         |
| $wR_2^b$                     | 0.2197                         |

$$^a R_1 = \sum ||F_o| - |F_c|| / \sum |F_o|. \quad ^b wR_2 = \{ \sum [w(F_o^2 - F_c^2)^2] / \sum [w(F_o^2)^2] \}^{1/2}$$

2  
3  
4

1 **Table S2.** The comparison of the structures and properties between **Cd-CCP** and the viologen-  
 2 based CCPs reported in the literatures.

| Coordination Polymers                                                                                                                                 | Structure                                                                  | Properties                                                                                              | References |
|-------------------------------------------------------------------------------------------------------------------------------------------------------|----------------------------------------------------------------------------|---------------------------------------------------------------------------------------------------------|------------|
| $[\text{Cu}_2\text{L}(\text{H}_2\text{O})_2] \cdot (\text{NO}_3)_2 \cdot 5.5\text{H}_2\text{O}$                                                       | 3D cationic framework;<br>nbo-type topology                                | dye capture and $\text{Cr}_2\text{O}_7^{2-}$<br>removal                                                 | S3         |
| $\{[\text{Cd}(\text{Bpybc})_2] \cdot 2\text{ClO}_4 \cdot 7\text{H}_2\text{O}\}_n$                                                                     | 1D double helical cationic<br>chains                                       | photochromism                                                                                           | S4         |
| $\{[\text{Ln}_3(\text{bcbp})_3(\text{NO}_3)_7] \cdot \text{NO}_3 \cdot \text{ClO}_4\}_n$                                                              | 3D cationic framework;                                                     | $\text{Cr}_2\text{O}_7^{2-}$ and ammonia sensing                                                        | S5         |
| $\{[\text{Zn}_3(\text{L})_2(\text{H}_2\text{O})_8] \cdot 2(\text{SO}_4) \cdot 2(\text{H}_2\text{O})\}_n$                                              | four-fold interpenetrating<br>2D cationic layer                            | photochromism                                                                                           | S6         |
| $\{[\text{Zn}(\text{L})(\text{H}_2\text{O})_2] \cdot \text{NO}_3 \cdot \text{H}_2\text{O}\}_n$                                                        | 3D cationic two-fold<br>interpenetrating framework                         | photochromism                                                                                           |            |
| $\{[\text{Eu}(\mu_2\text{-OH})(\text{L})(\text{H}_2\text{O})] \cdot \text{NO}_3 \cdot \text{H}_2\text{O}\}_n$                                         | 1D cationic rod-like<br>infinite chain                                     | photochromism, photo-<br>modulated luminescence,<br>photoswitchable NLO and<br>piezoelectric properties | S7         |
| $\{[\text{Tb}_4(\mu_3\text{-OH})_4\text{L}_3 \cdot (\text{H}_2\text{O})_7] \text{Cl}_{0.63} \cdot (\text{NO}_3)_{4.37} \cdot 3\text{H}_2\text{O}\}_n$ | 3D cationic framework;                                                     | photochromism,<br>photomodulated fluorescence,<br>and luminescent pH Sensing                            | S8         |
| $[\text{Cd}_4(\text{pc}_1)_3\text{Cl}_6] \cdot \text{CdCl}_4 \cdot \text{guest}$                                                                      | 3D cationic framework;                                                     | ammonia uptake                                                                                          | S9         |
| $\text{Zn}(\text{bcbp})(\text{PO}_3\text{F})$                                                                                                         | 2D cationic layer                                                          | photochromism                                                                                           | S10        |
| $\{[\text{Cu}_2(\text{bdcbp})(\text{H}_2\text{O})_2] \cdot 2\text{NO}_3 \cdot 2\text{H}_2\text{O}\}_n$                                                | 3D cationic framework                                                      | $\text{Cr}_2\text{O}_7^{2-}$ adsorption and dye<br>separation                                           | S11        |
| $\text{Eu}(\text{bc bpy})_3(\text{H}_2\text{O})_3 \cdot 3\text{NO}_3$                                                                                 | 3D cationic framework;                                                     | colorimetric and<br>thermochromic responses                                                             | S12        |
| $\{[\text{Cd}(\text{bcbp})_2(\text{CdI}_4)] \cdot 3\text{H}_2\text{O}\}_n$                                                                            | 3D cationic framework;<br>thirteen-fold<br>interpenetrating dia<br>network | selective coloration and ion-<br>controlled photochromism                                               | This work  |

1 **Table S3.** EDS results for **Cd-CCP-X**.<sup>S13</sup>

| <b>Cd-CCP-F:</b> $\{[\text{Cd}(\text{bcbp})_2(\text{CdI}_4)_{0.65}\text{F}_{0.70}] \cdot 3\text{H}_2\text{O}\}_n$   |         |         |         |         |         |         |         |
|---------------------------------------------------------------------------------------------------------------------|---------|---------|---------|---------|---------|---------|---------|
| Point 1                                                                                                             |         | Point 2 |         | Point 3 |         | Average |         |
| Element                                                                                                             | Weight% | Element | Weight% | Element | Weight% | Element | Weight% |
| C                                                                                                                   | 41.6    | C       | 41.2    | C       | 42.4    | C       | 41.7    |
| N                                                                                                                   | 4.5     | N       | 4.7     | N       | 3.8     | N       | 4.3     |
| F                                                                                                                   | 1.2     | F       | 1.0     | F       | 1.1     | F       | 1.1     |
| <b>Cd-CCP-Cl:</b> $\{[\text{Cd}(\text{bcbp})_2(\text{CdI}_4)_{0.54}\text{Cl}_{0.92}] \cdot 3\text{H}_2\text{O}\}_n$ |         |         |         |         |         |         |         |
| Point 1                                                                                                             |         | Point 2 |         | Point 3 |         | Average |         |
| Element                                                                                                             | Weight% | Element | Weight% | Element | Weight% | Element | Weight% |
| C                                                                                                                   | 44.2    | C       | 43.4    | C       | 43.1    | C       | 43.6    |
| N                                                                                                                   | 4.3     | N       | 4.0     | N       | 4.3     | N       | 4.2     |
| Cl                                                                                                                  | 2.8     | Cl      | 2.3     | Cl      | 3.0     | Cl      | 2.7     |
| <b>Cd-CCP-Br:</b> $\{[\text{Cd}(\text{bcbp})_2(\text{CdI}_4)_{0.39}\text{Br}_{1.23}] \cdot 3\text{H}_2\text{O}\}_n$ |         |         |         |         |         |         |         |
| Point 1                                                                                                             |         | Point 2 |         | Point 3 |         | Average |         |
| Element                                                                                                             | Weight% | Element | Weight% | Element | Weight% | Element | Weight% |
| C                                                                                                                   | 43.3    | C       | 45.3    | C       | 45.2    | C       | 44.6    |
| N                                                                                                                   | 3.9     | N       | 4.2     | N       | 4.4     | N       | 4.2     |
| Br                                                                                                                  | 7.7     | Br      | 6.8     | Br      | 7.8     | Br      | 7.4     |
| <b>Cd-CCP-I:</b> $\{[\text{Cd}(\text{bcbp})_2(\text{CdI}_4)_{0.34}\text{I}_{1.32}] \cdot 3\text{H}_2\text{O}\}_n$   |         |         |         |         |         |         |         |
| Point 1                                                                                                             |         | Point 2 |         | Point 3 |         | Average |         |
| Element                                                                                                             | Weight% | Element | Weight% | Element | Weight% | Element | Weight% |
| C                                                                                                                   | 42.8    | C       | 42.7    | C       | 43.4    | C       | 43.0    |
| N                                                                                                                   | 4.6     | N       | 3.8     | N       | 3.6     | N       | 4.0     |
| I                                                                                                                   | 25.7    | I       | 26.0    | I       | 256.2   | I       | 25.6    |

1 **Table S4** Formal potentials, onset potentials of the first reduction peaks, HOMO and LUMO  
 2 energies and band gaps of **Cd-CCP** and **Cd-CCP-X**.<sup>a</sup>

|                  | $E_1$<br>(V) | $E_2$<br>(V) | $E_{\text{Red}}^{\text{Onset}}$<br>(V) | $E_g$<br>(eV) <sup>b</sup> | LUMO<br>(eV) <sup>c</sup> | HOMO<br>(eV) <sup>d</sup> |
|------------------|--------------|--------------|----------------------------------------|----------------------------|---------------------------|---------------------------|
| <b>Cd-CCP</b>    | -0.242       | -0.843       | -0.202                                 | 2.000                      | -4.498                    | -6.498                    |
| <b>Cd-CCP-F</b>  | -0.258       | -0.849       | -0.210                                 | 2.200                      | -4.490                    | -6.690                    |
| <b>Cd-CCP-Cl</b> | -0.262       | -0.875       | -0.218                                 | 2.175                      | -4.482                    | -6.657                    |
| <b>Cd-CCP-Br</b> | -0.282       | -0.936       | -0.239                                 | 1.990                      | -4.461                    | -6.451                    |
| <b>Cd-CCP-I</b>  | -0.311       | -0.967       | -0.257                                 | 1.959                      | -4.443                    | -6.402                    |

3

4

5 <sup>a</sup>Potentials are reported vs Ag/AgCl. <sup>b</sup>Band gap calculated from the onset wavelength ( $\lambda_{\text{onset}}$ , nm) of  
 6 the UV-vis spectrum using  $E_g = 1240/\lambda_{\text{onset}}$ . <sup>c</sup>Calculated using  $E_{\text{LUMO}} = -(E_{\text{Red}}^{\text{onset}} + 4.70)$ (eV).<sup>S14</sup>

7 <sup>d</sup>HOMO = LUMO -  $E_g$ .

1 **Table S5.** FT-IR spectrum signals and assignment for Cd-CCP.<sup>S15</sup>

| Band (cm <sup>-1</sup> ) | Assignment                                               |
|--------------------------|----------------------------------------------------------|
| 3116 (w)                 | O–H stretching in water                                  |
| 3051 (w)                 | C–H stretching from pyridinium rings                     |
| 1633 (s)                 | pyridinium ring stretching                               |
| 1611 (s)                 | C=N/C=C stretching from pyridinium rings                 |
| 1574 (m)                 | Asymmetric stretching vibration of the carboxylate group |
| 1535 (m)                 | Aromatic C–C ring stretching                             |
| 1486 (w)                 | Aromatic C–C ring stretching                             |
| 1435 (m)                 | Aromatic C–C ring stretching                             |
| 1389 (s)                 | Symmetric stretching vibration of the carboxylate group  |
| 1300 (w)                 | Aromatic ring stretching                                 |
| 1248 (w)                 | C–C stretching                                           |
| 1221 (w)                 | C–pyridinium ring breathing                              |
| 1039 (w)                 | C–pyridinium ring breathing                              |
| 1020 (w)                 | Aromatic C–H in plane bending                            |
| 1006 (w)                 | Aromatic ring stretching                                 |
| 852 (m)                  | Aromatic ring stretching                                 |
| 830 (m)                  | Aromatic C–H pyridinium ring substitution bands          |
| 784 (s)                  | Aromatic ring stretching                                 |

2

3



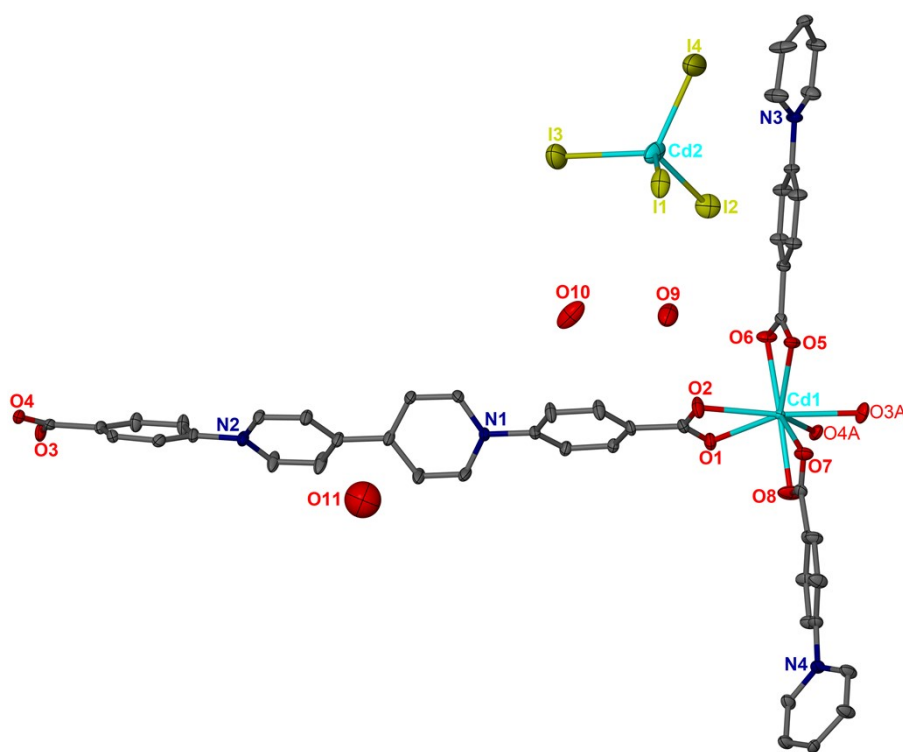

1

2 **Figure S1** Asymmetric unit of **Cd-CCP** (all atoms with displacement ellipsoids at the 30% probability level;  
 3 symmetry codes: A,  $2+x$ ,  $3/2-y$ ,  $1/2+z$ ). Hydrogen atoms are omitted for clarity.

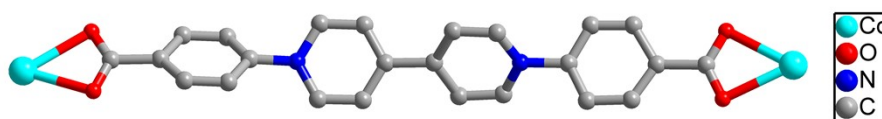

4

5 **Figure S2** Coordination mode of Harris notation  $[2.1_11_1_21_2]$  for the deprotonated bcbp ligand in **Cd-CCP**.

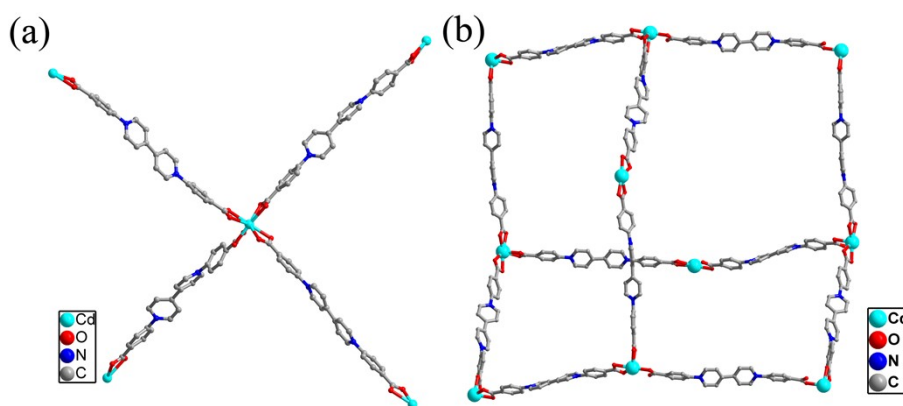

6

7 **Figure S3** (a) View of the coordination mode of Cd(II) ion in **Cd-CCP**. (b) Representation of the diamondoid cage in  
 8 **Cd-CCP**.

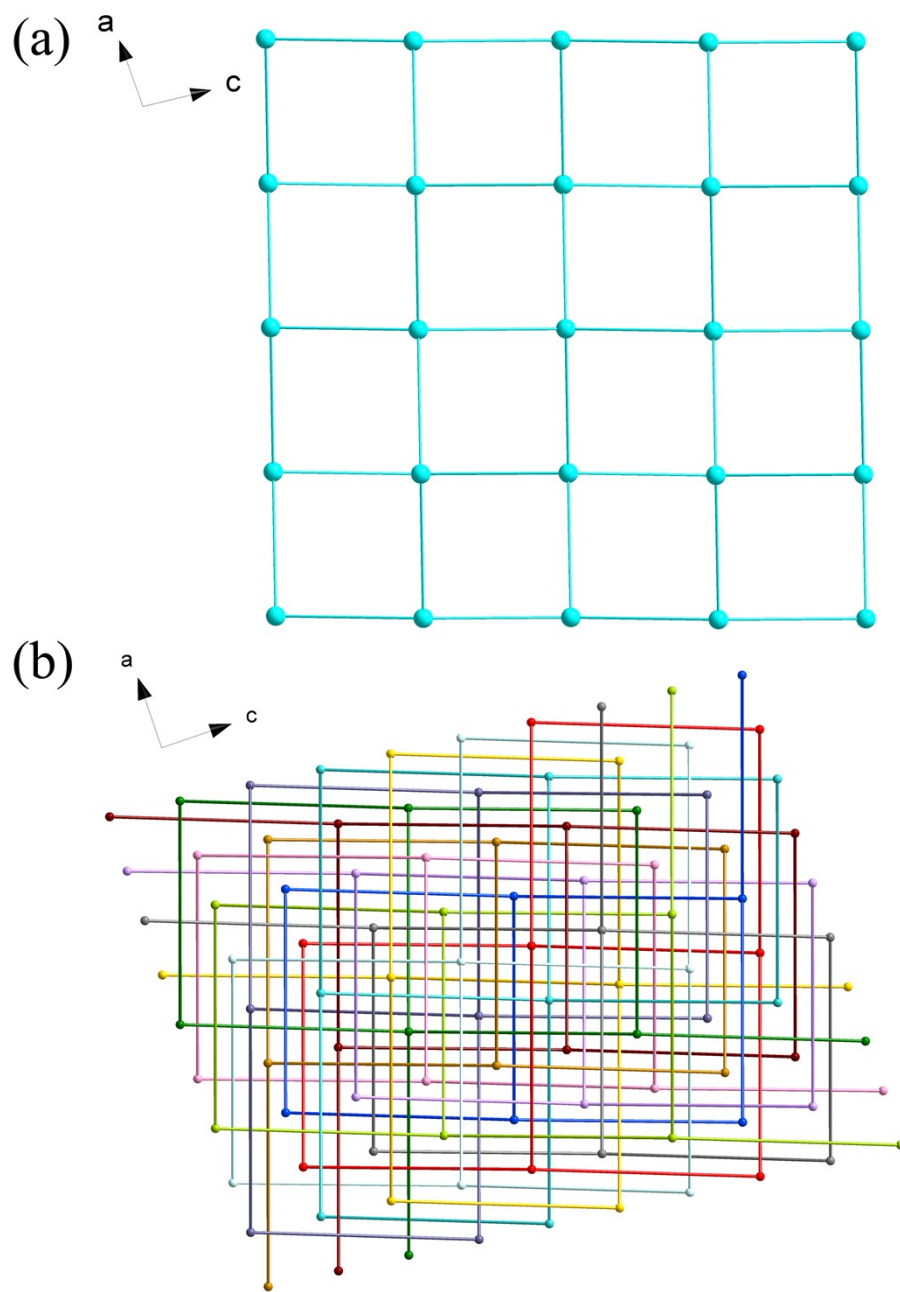

1  
2 **Figure S4** (a) Single topological 3D **dia** net of **Cd-CCP** viewed from  $b$  axis; (b) Thirteen-fold interpenetrated  
3 network of **Cd-CCP** viewed from  $b$  axis.

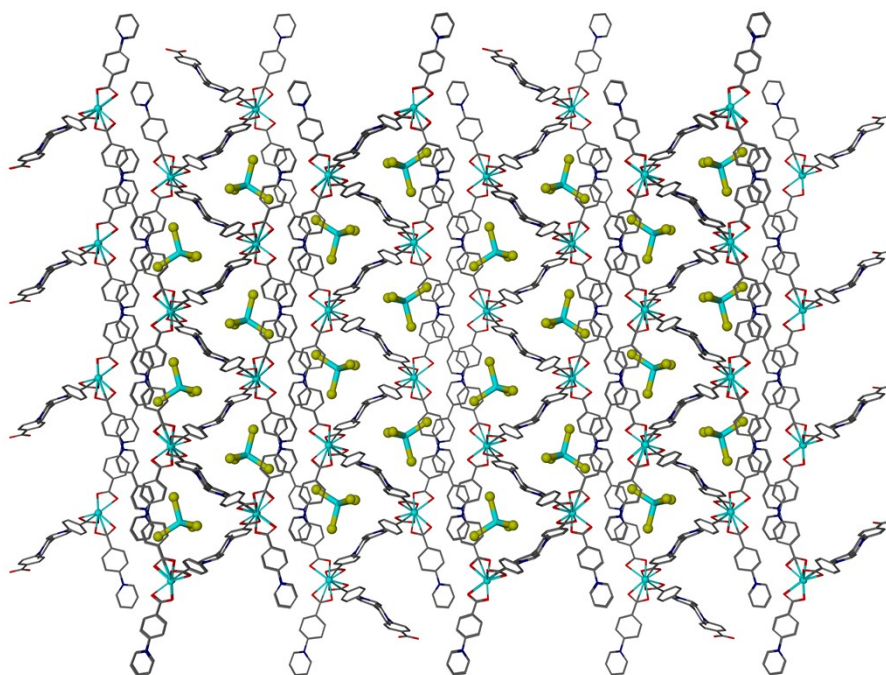

1

2 **Figure S5** Presentation of 3D cationic framework of **Cd-CCP** viewing along *a* axis, with triangular channels  
3 occupied with [CdI<sub>4</sub>]<sup>2-</sup> anions.

4

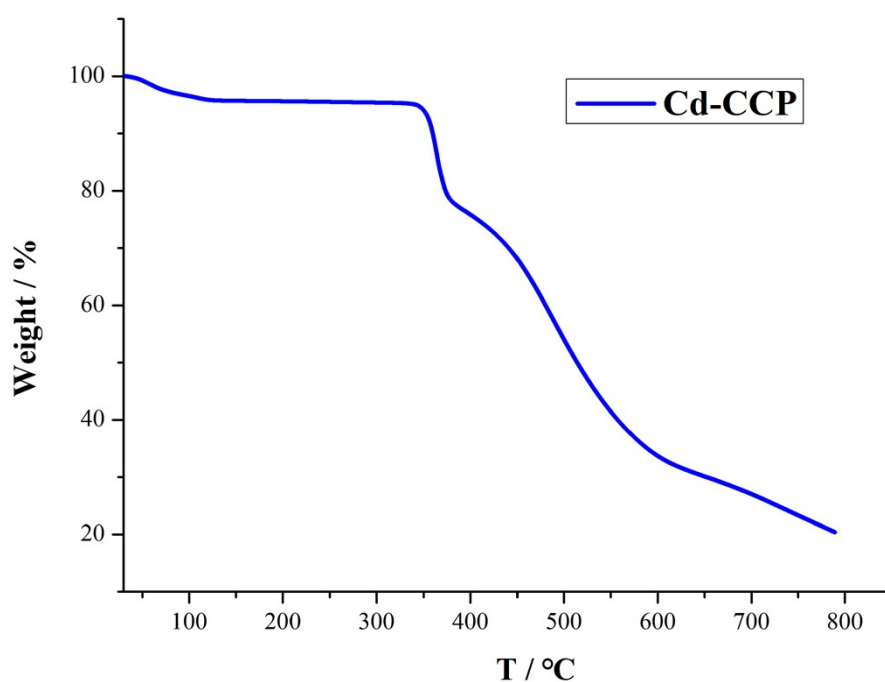

5

6 **Figure S6** TGA curve of **Cd-CCP**. The thermogravimetric analysis indicates three lattice water molecules were  
7 gradually released during 30-105 °C with 3.64% weight loss (calcd 3.42%). And its framework is stable up to 348 °C,  
8 after which the framework begins to collapse.

9

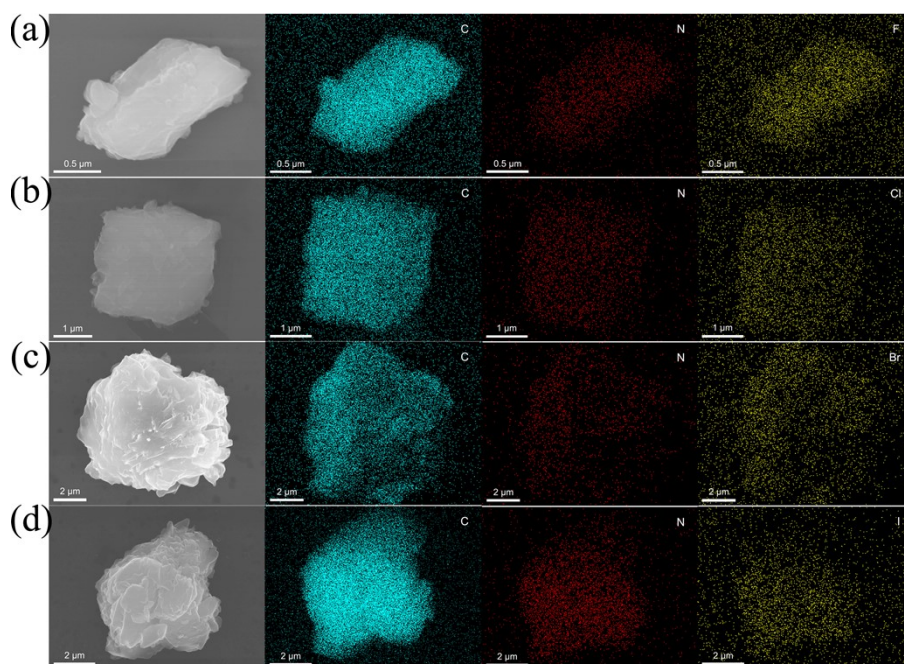

1

2 **Figure S7** SEM images and EDS mappings of Cd-CCP-F (a), Cd-CCP-Cl (b), Cd-CCP-Br (c), and Cd-CCP-I (d).

3

4

5

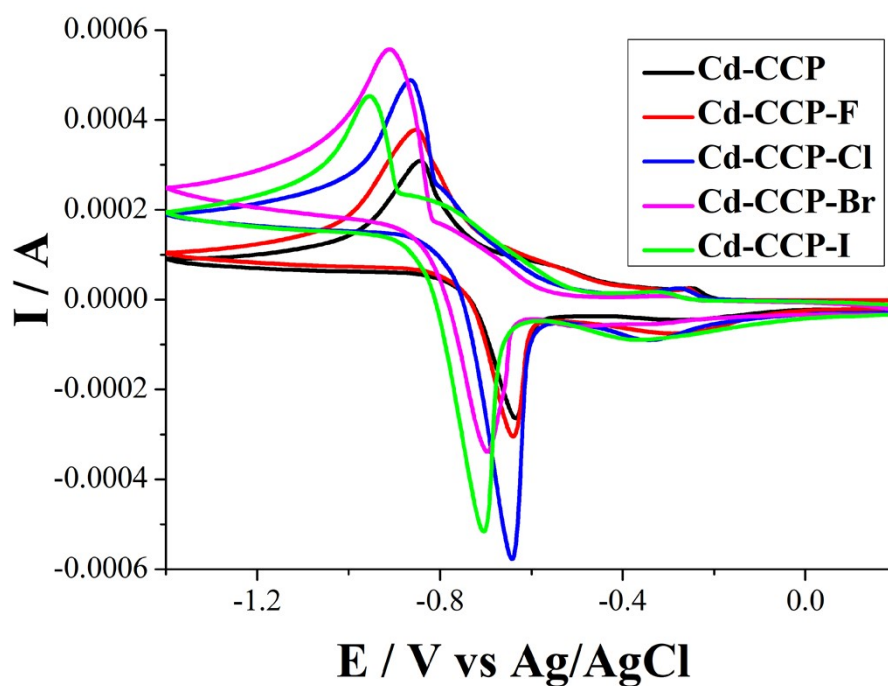

6

7 **Figure S8** Cyclic voltammograms of Cd-CCP and Cd-CCP-X with the corresponding sodium salts as supporting  
8 electrolytes (1 M, NaF, NaF, NaCl, NaBr, and NaI). Scan rate  $\nu = 50 \text{ mV s}^{-1}$ .

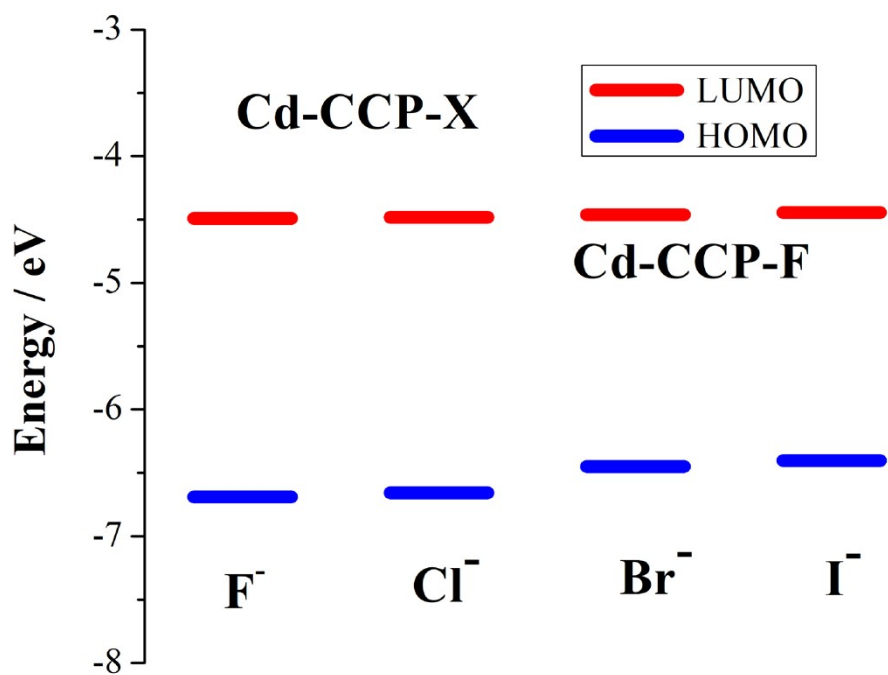

1  
2 **Figure S9** HOMO-LUMO energy levels for Cd-CCP-X.

3  
4  
5  
6

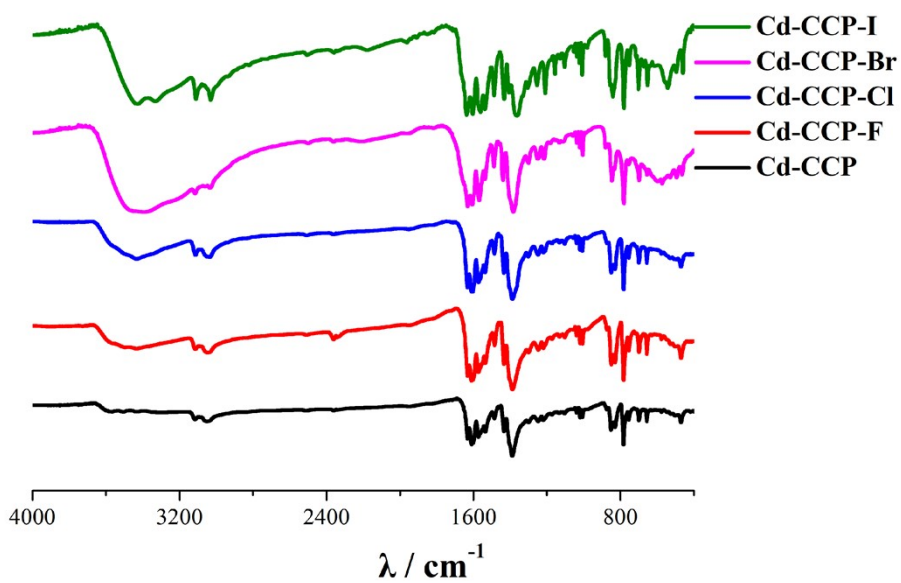

7  
8 **Figure S10** FT-IR spectra of Cd-CCP, Cd-CCP-F, Cd-CCP-Cl, Cd-CCP-Br, and Cd-CCP-I.

9  
10  
11

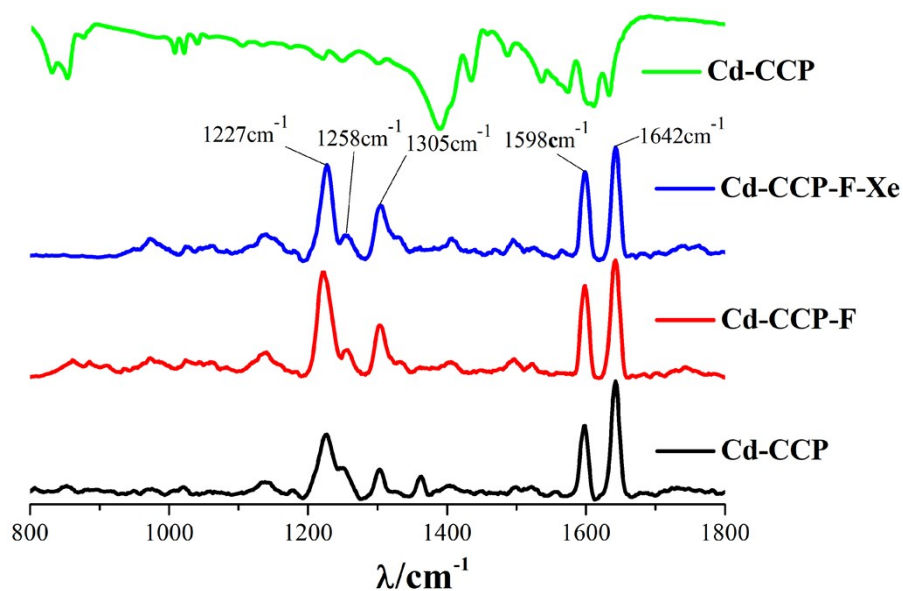

1

2 **Figure S11** FT-IR spectrum of Cd-CCP (green), Raman spectra of Cd-CCP (black), Cd-CCP-F (red) and Cd-CCP-  
 3 F-Xe (blue).

4

5

6

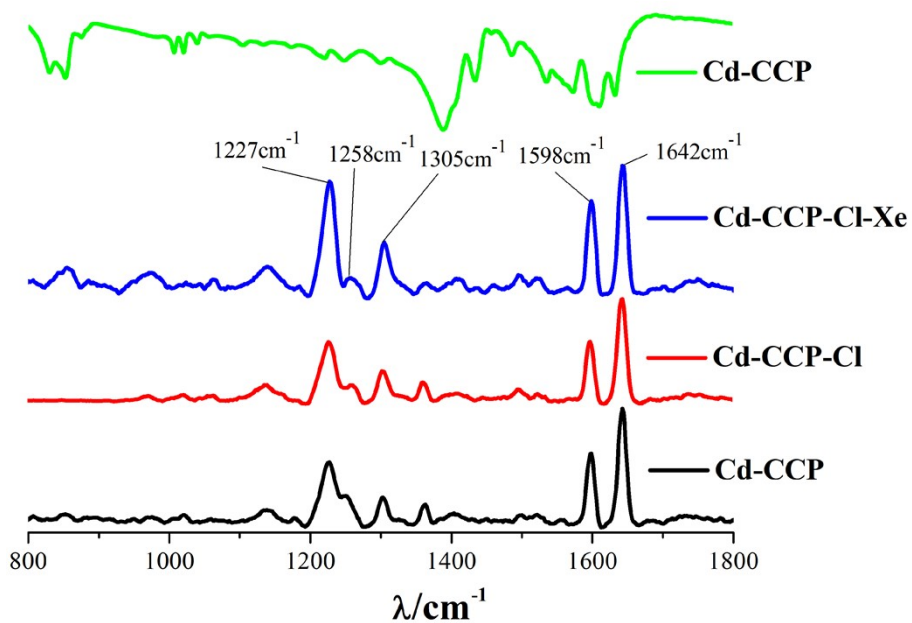

7

8 **Figure S12** FT-IR spectrum of Cd-CCP (green), Raman spectra of Cd-CCP (black), Cd-CCP-Cl (red) and Cd-  
 9 CCP-Cl-Xe (blue).

10

11

12

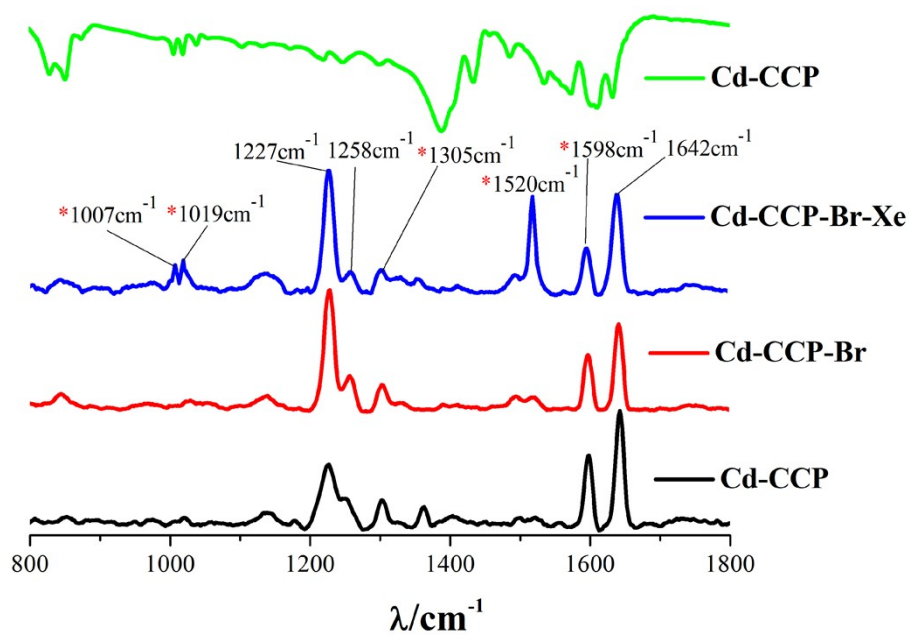

1

2 **Figure S13** FT-IR spectrum of **Cd-CCP** (green), Raman spectra of **Cd-CCP** (black), **Cd-CCP-Br** (red) and **Cd-**  
 3 **CCP-Br-Xe** (blue).

4

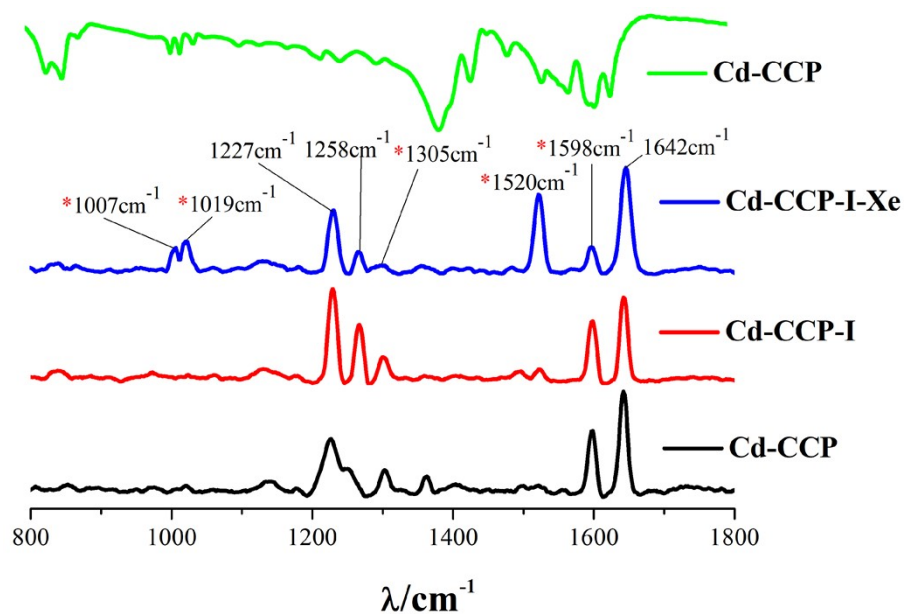

5

6 **Figure S14** FT-IR spectrum of **Cd-CCP** (green), Raman spectra of **Cd-CCP** (black), **Cd-CCP-I** (red) and **Cd-CCP-**  
 7 **I-Xe** (blue).

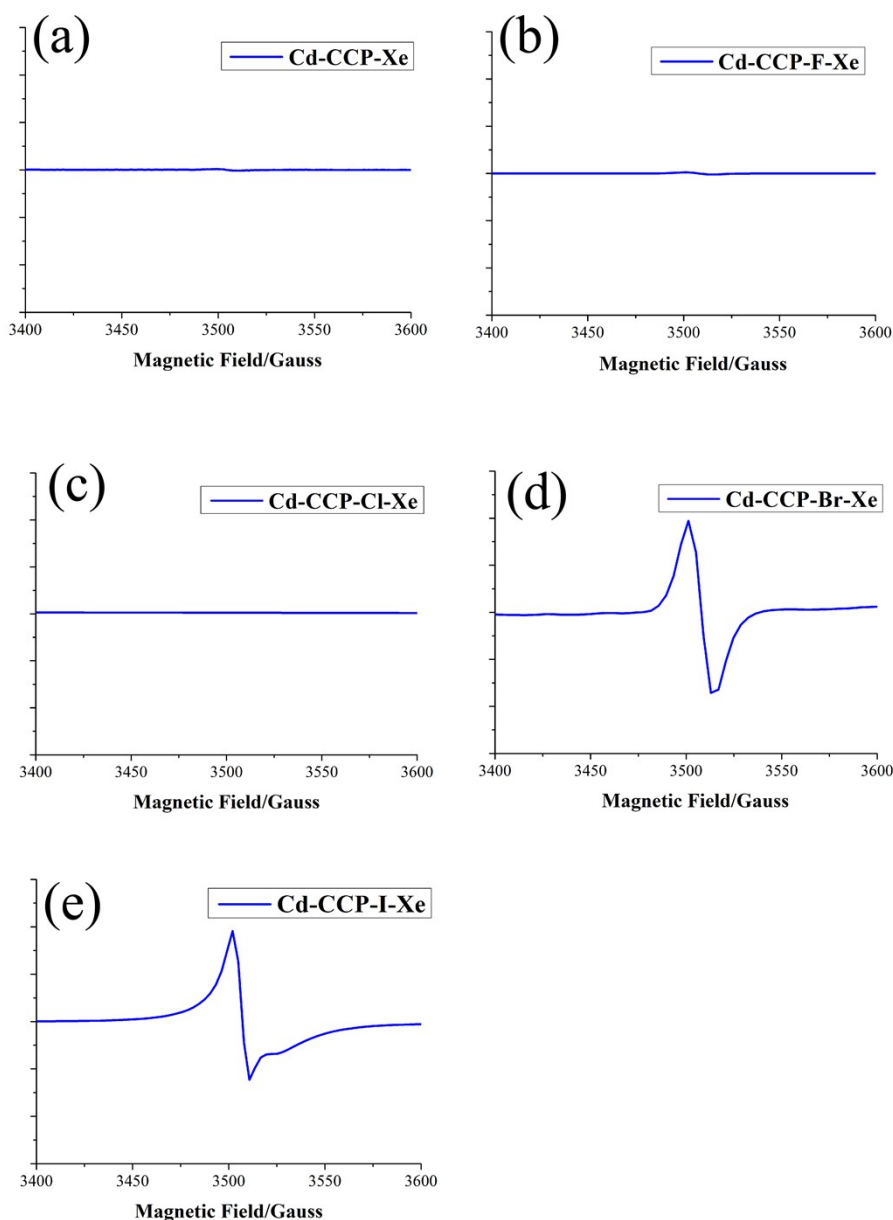

1  
 2 **Figure S15** EPR spectra of Cd-CCP-Xe (a), Cd-CCP-F-Xe (b), Cd-CCP-Cl-Xe (c), Cd-CCP-Br-Xe (d) and Cd-  
 3 CCP-I-Xe (e).

4

## 5 References:

- 6 S1. (a) M. Leroux, N. Mercier, M. Allain, M. C. Dul, J. Dittmer, A. H. Kassiba, J. P. Bellat, G. Weber and I.  
 7 Bezverkhyy, *Inorg. Chem.*, 2016, **55**, 8587; (b) Z. Y. Li, W. Y. Cai, X. M. Yang, A. L. Zhou, Y. Zhu, H. Wang, X.  
 8 Zhou, K. C. Xiong, Q. F. Zhang and Y. L. Gai, *Cryst. Growth Des.*, 2020, **20**, 3466.  
 9 S2. G. M. Sheldrick, *Acta Crystallogr. Sect. C-Struct. Chem.*, 2015, **71**, 3.  
 10 S3 C. Zhang, Y. Liu, L. Sun, H. Shi, C. Shi, Z. Liang and J. Li, *Chem. - Eur. J.*, 2018, **24**, 2718.  
 11 S4 J. K. Sun, P. Wang, Q. X. Yao, Y. J. Chen, Z. H. Li, Y. F. Zhang, L. M. Wu and J. Zhang, *J. Mater. Chem.*,  
 12 2012, **22**, 12212.



- 1 S5 Z. Li, W. Cai, X. Yang, A. Zhou, Y. Zhu, H. Wang, X. Zhou, K. Xiong, Q. Zhang and Y. Gai, *Cryst. Growth*  
2 *Des.*, 2020, **20**, 3466.
- 3 S6 H. Y. Li, J. Xu, L. K. Li, X. S. Du, F. A. Li, H. Xu and S. Q. Zang, *Cryst. Growth Des.*, 2017, **17**, 6311.
- 4 S7 H. Y. Li, H. Xu, S. Q. Zang and T. C. W. Mak, *Chem. Commun.*, 2016, **52**, 525.
- 5 S8 H. Y. Li, Y. L. Wei, X. Y. Dong, S. Q. Zang and T. C. W. Mak, *Chem. Mater.*, 2015, **27**, 1327.
- 6 S9 M. Leroux, N. Mercier, M. Allain, M. C. Dul, J. Dittmer, A. H. Kassiba, J. P. Bellat, G. Weber and I.  
7 Bezverkhyy, *Inorg. Chem.*, 2016, **55**, 8587.
- 8 S10 J. J. Liu, Y. F. Guan, M. J. Lin, C. C. Huang and W. X. Dai, *Cryst. Growth Des.*, 2016, **16**, 2836.
- 9 S11 X. Yang, C. Yan, Z. Li, X. Li, Q. Yu, T. Sang, Y. Gai, Q. Zhang and K. Xiong, *Inorg. Chem.*, 2021, **60**, 5988.
- 10 S12 Y. Q. Sun, F. Wan, X. X. Li, J. Lin, T. Wu, S. T. Zheng and X. Bu, *Chem. Commun.*, 2016, **52**, 10125.
- 11 S13 (a) P. Yu, L. M. Wu, L. J. Zhou and L. Chen, *J. Am. Chem. Soc.*, 2014, **136**, 480; (b) P. Yu, L. J. Zhou and L.  
12 Chen, *J. Am. Chem. Soc.*, 2012, **134**, 2227.
- 13 S14 C. M. Cardona, W. Li, A. E. Kaifer, D. Stockdale and G. C. Bazan, *Adv. Mater.*, 2011, **23**, 2367.
- 14 S15 H. L. Nguyen, F. Gandara, H. Furukawa, T. L. H. Doan, K. E. Cordova and O. M. Yaghi, *J. Am. Chem. Soc.*,  
15 2016, **138**, 4330.
